# Supplementary material for: Host-Adaptation of Burkholderia pseudomallei Alters Metabolism and Virulence: a Global Proteome Analysis
Source: PubMed Central journal article supplement (PMC5567125; doi:10.1038/s41598-017-09373-0), 2017-08-21
Supplement: 41598_2017_9373_MOESM1_ESM.pdf [file 41598_2017_9373_MOESM1_ESM.pdf]

# **Host-Adaptation of *Burkholderia pseudomallei* Alters Metabolism and Virulence: a Global Proteome Analysis**

Vanitha Mariappan<sup>1</sup>, Kumutha Malar Vellasamy<sup>1</sup>, Jamuna Vadivelu<sup>1\*</sup>

<sup>1</sup>Department of Medical Microbiology, Tropical Infectious Diseases Research and Education Centre (TIDREC), Faculty of Medicine, University of Malaya, 50603 Kuala Lumpur, Malaysia

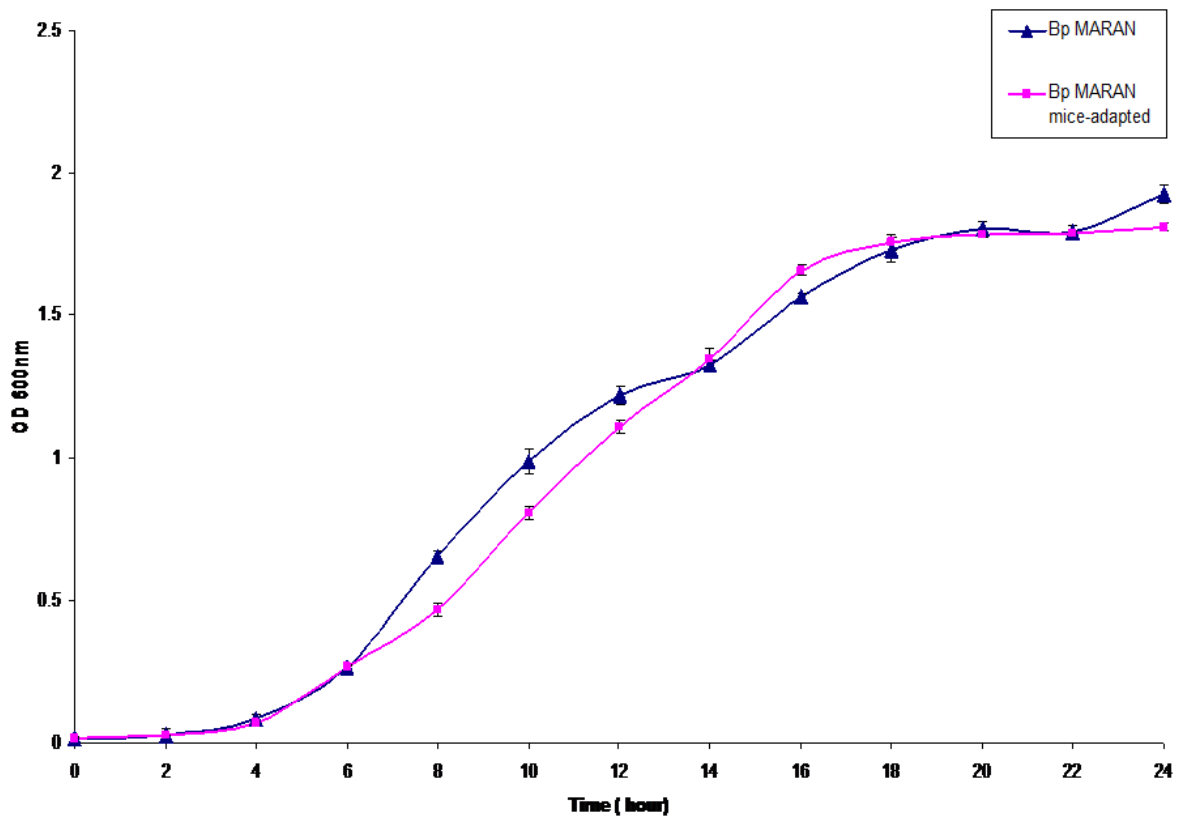

**Supplementary Figure 1.** Growth curve of Bp<sub>MARAN</sub> and Bp<sub>mouse-adapted</sub>. The culture was inoculated in LB medium and grown at 37°C from 0 h to 24 h. It was harvested at every 2 h intervals and the bacterial density was determined at OD<sub>600nm</sub>. The experiment was conducted in three independent replicates (the error bars indicate the standard deviation).

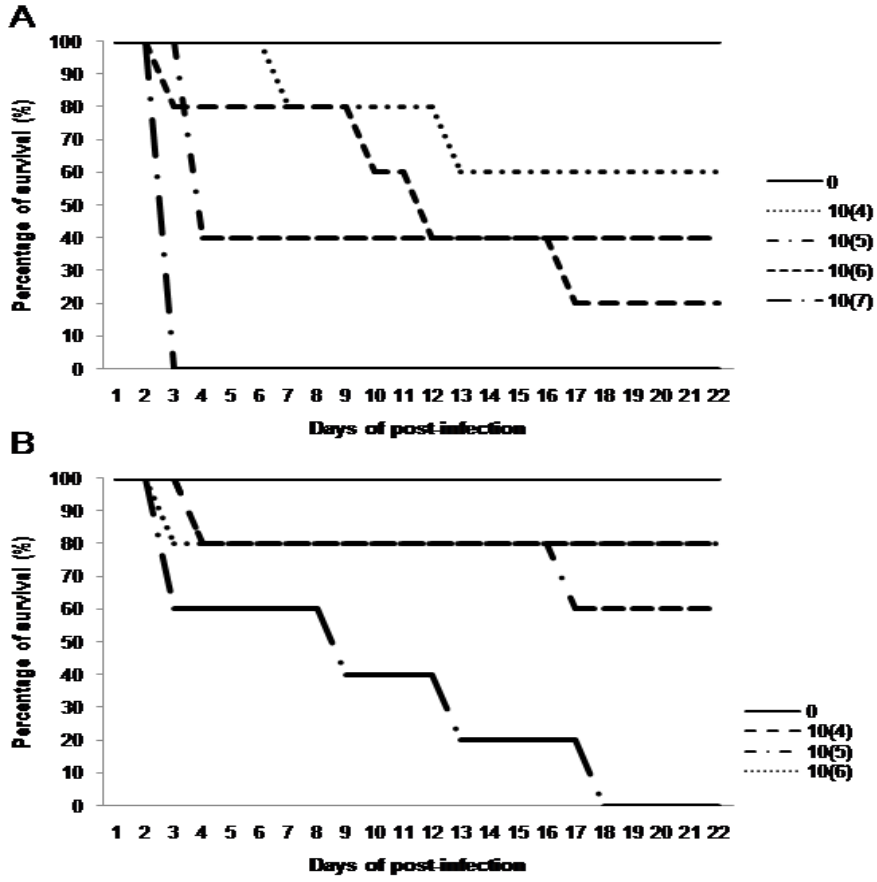

Supplementary Figure 2. LD<sub>50</sub> of (A) Bp<sub>MARAN</sub> and (B) Bp<sub>mouse</sub>-adapted.

Table S1: List of primers used for gene expression

| <b>Gene</b>                          | <b>Primer ((5'-3')</b> |                        |
|--------------------------------------|------------------------|------------------------|
| catalase-peroxidase                  | F                      | aagcgaagtgcccggtccat   |
|                                      | R                      | gtagttgaaatccttgcca    |
| hsp 20                               | F                      | gaagatcgacgtgaccgaaa   |
|                                      | R                      | gccttccttcagttcctgt    |
| hypothetical protein BPSS1107        | F                      | gacaagcagaccggcgtgat   |
|                                      | R                      | caggctgatctgttcgtagtcg |
| hypothetical protein BPSL1958        | F                      | cgctcgcgacatcgaaccag   |
|                                      | R                      | ccgacaacctatgccacgtt   |
| chaperonin GroEL                     | F                      | cagttcgaccgcggtacctgtc |
|                                      | R                      | aggtcgcggatgttcgacacct |
| elongation factor Tu                 | F                      | gggcgtggaaatgtccgcaagc |
|                                      | R                      | accggcttcgccagaacctg   |
| extracellular ligand binding protein | F                      | acgaactacaccggcgtgat   |
|                                      | R                      | ttacatcgtcacctgatcgagg |
| outer membrane protein               | F                      | aatacgttgtcggcgctgaa   |
|                                      | R                      | gcatggttgaagtggactgc   |
